# Supplementary material
Source: Royal Society of Chemistry journal article supplement (doi:10.1039/d5ta08253f)
Supplement: d5ta08253f1.pdf [file d5ta08253f1.pdf]

## *Supplementary Information*

---

### **Gold-bridged $\text{LaCo}_{1-x}\text{Au}_x\text{O}_3$ perovskite nanocomposite for synergically enhanced electrochemical hydrogen storage**

Maryam Ostadebrahim,<sup>a</sup> Mohammad Qorbani,<sup>\*bc</sup> Amr Sabbah,<sup>\*def</sup> Ying-Ren Lai,<sup>\*de</sup> Mohammad Soleimani,<sup>g</sup> Michitoshi Hayashi,<sup>deh</sup> Li-Chyong Chen,<sup>dei</sup> Kuei-Hsien Chen,<sup>dj</sup> and Omran Moradlou<sup>\*aj</sup>

<sup>a</sup>Department of Analytical Chemistry, Faculty of Chemistry, Alzahra University, Tehran 19938-93973, Iran.

Email: moradlou@as.edu.tw; moradlou@alzahra.ac.ir

<sup>b</sup>Undergraduate Program of Electro-Optical Engineering, National Taiwan Normal University, Taipei 11677, Taiwan.

Email: qorbani@ntnu.edu.tw

<sup>c</sup>Institute of Electro-Optical Engineering, National Taiwan Normal University, Taipei 11677, Taiwan

<sup>d</sup>Center for Condensed Matter Sciences, National Taiwan University, Taipei 10617, Taiwan.

Email: amrsabbah@ntu.edu.tw; yingrenlai@ntu.edu.tw

<sup>e</sup>Center of Atomic Initiative for New Materials, National Taiwan University, Taipei 10617, Taiwan.

<sup>f</sup>Tabbin Institute for Metallurgical Studies, Tabbin, Helwan 109, Cairo 11421, Egypt.

<sup>g</sup>Shimi Gen Pharmed, Saveh Industrial City, Saveh 39141-71984, Iran

<sup>h</sup>National Center for Theoretical Sciences, Taipei 10617, Taiwan.

<sup>i</sup>Department of Physics, National Taiwan University, Taipei 10617, Taiwan.

<sup>j</sup>Institute of Atomic and Molecular Sciences, Academia Sinica, Taipei 10617, Taiwan.

## Supplementary Figures

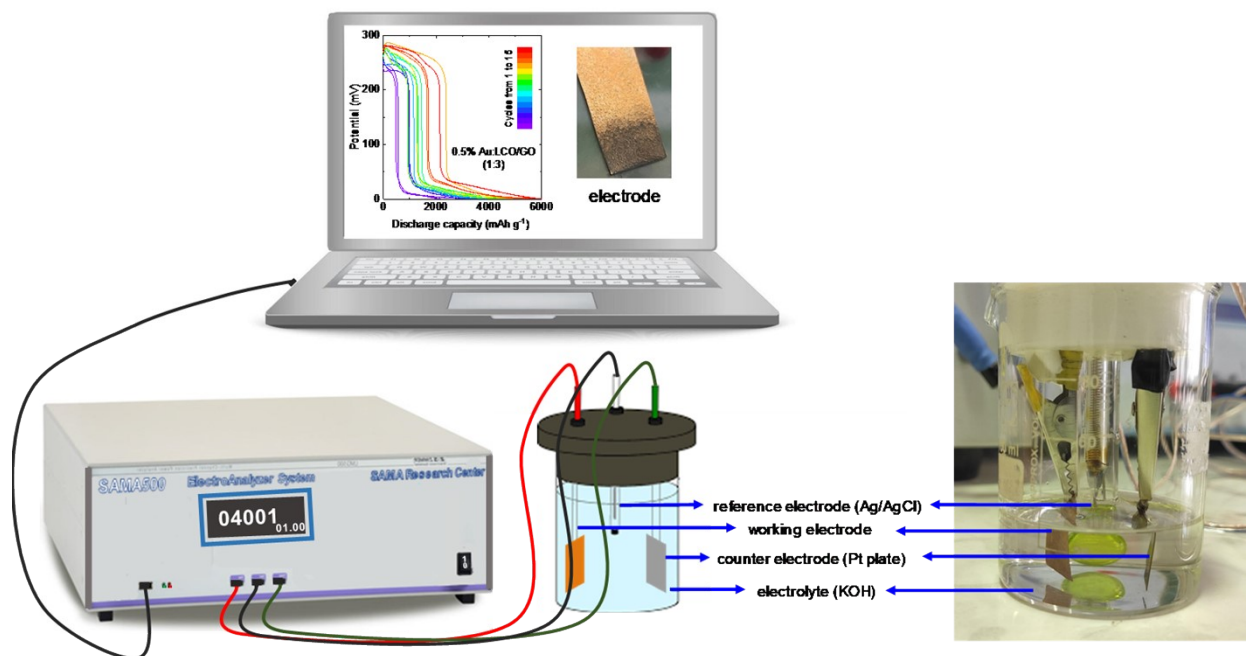

**Fig. S1** Hydrogen storage experimental setup. Hydrogen storage capacity of the samples was measured by GCD tests at a constant current of 1 mA (or 3.3 A g<sup>-1</sup>) using a SAMA 500 Electro-Analyzer system.

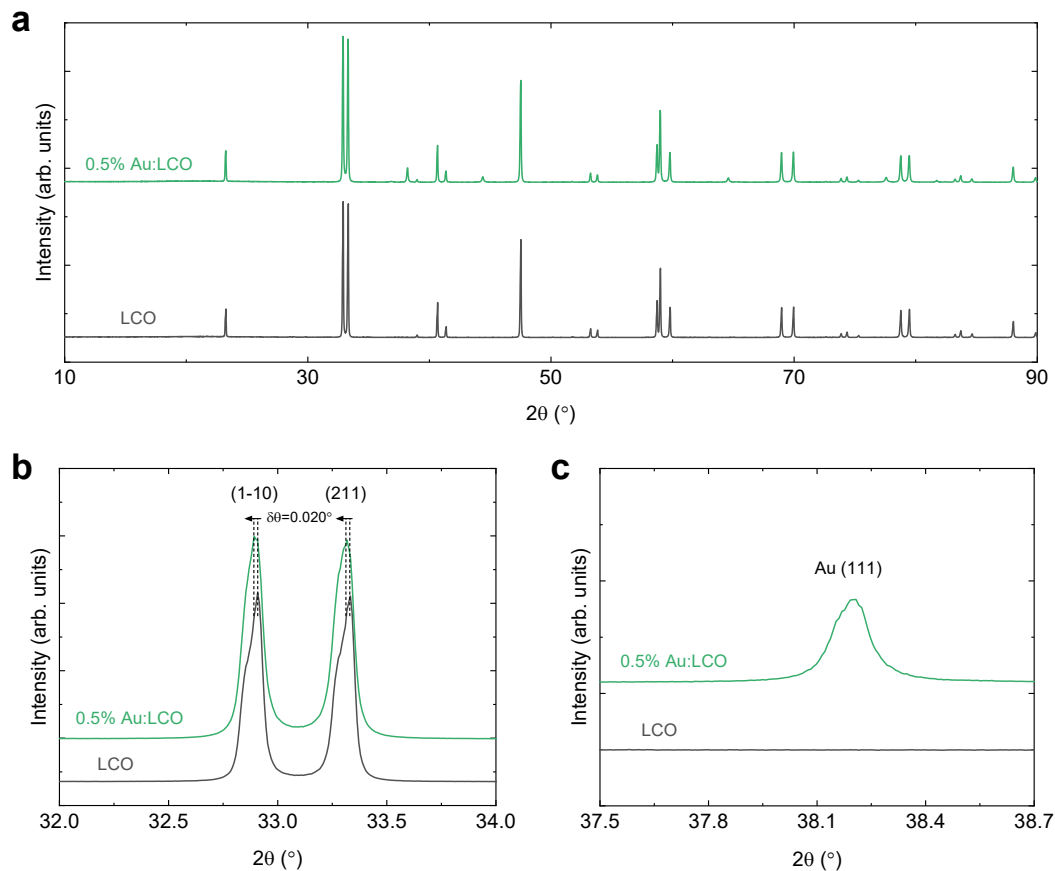

**Fig. S2** (a) Synchrotron XRD patterns of LCO and 0.5% Au:LCO. (b–c) XRD patterns corresponding to the (1-10) and (211) LCO or 0.5% Au:LCO and Au (111) crystalline planes, respectively. The observed bifurcation of the (1-10) and (211) peaks are the characteristic peak of the rhombohedral structure might be due to the distortion in the crystal structure.<sup>1, 2</sup>

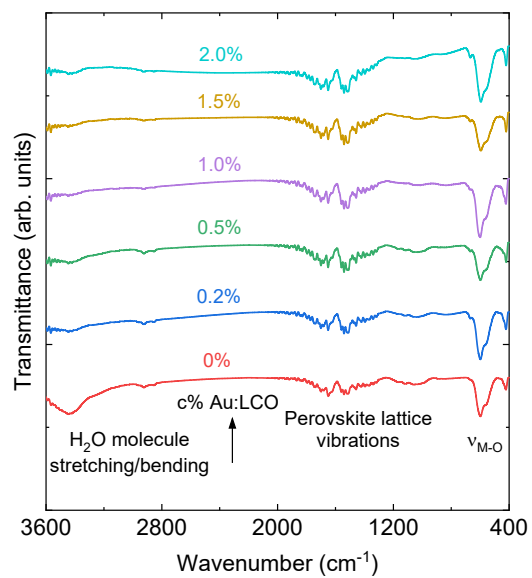

**Fig. S3** FTIR spectra of  $c\%$  Au:LCO where  $c = 0$  to 2.0 at%.

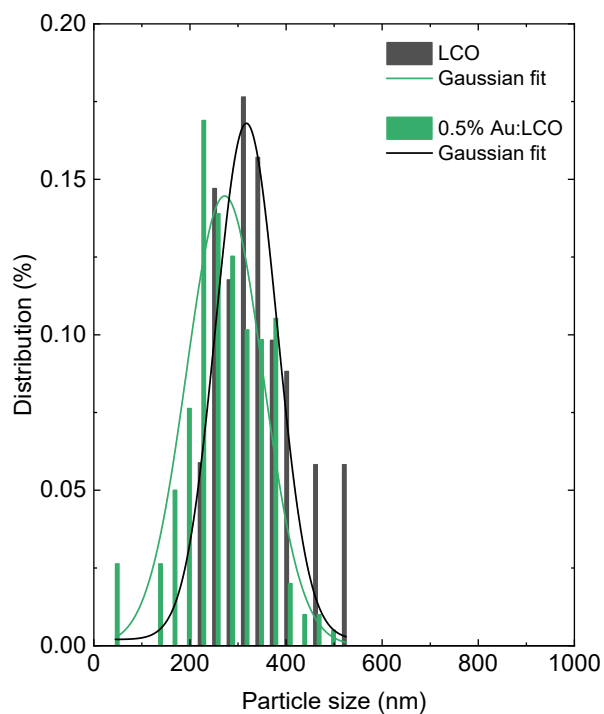

**Fig. S4** Particle size distributions of the LCO and 0.5% Au:LCO measured from their FE-SEM images with a scale of 500 nm.

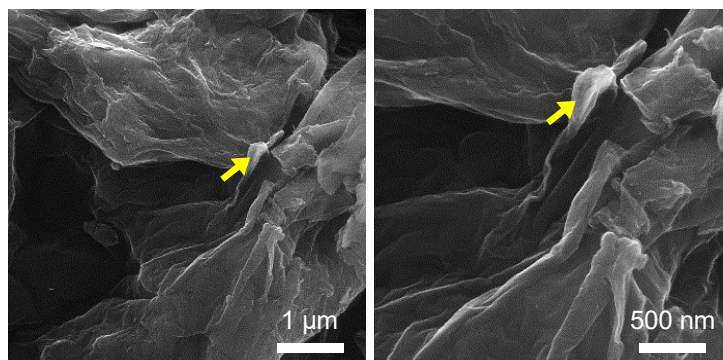

**Fig. S5** FE-SEM images of GO nanosheets at different magnifications. Yellow arrows guide the eyes to the zoomed-in region in each image.

---

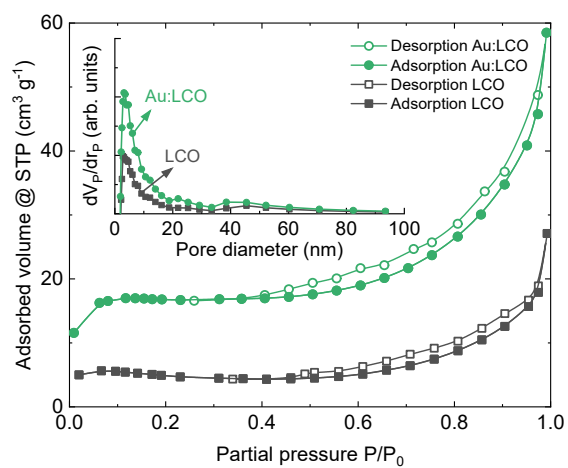

**Fig. S6** BET N<sub>2</sub> adsorption/desorption curves of LCO and 0.5% Au:LCO. Inset shows the pore size distribution curves.

---

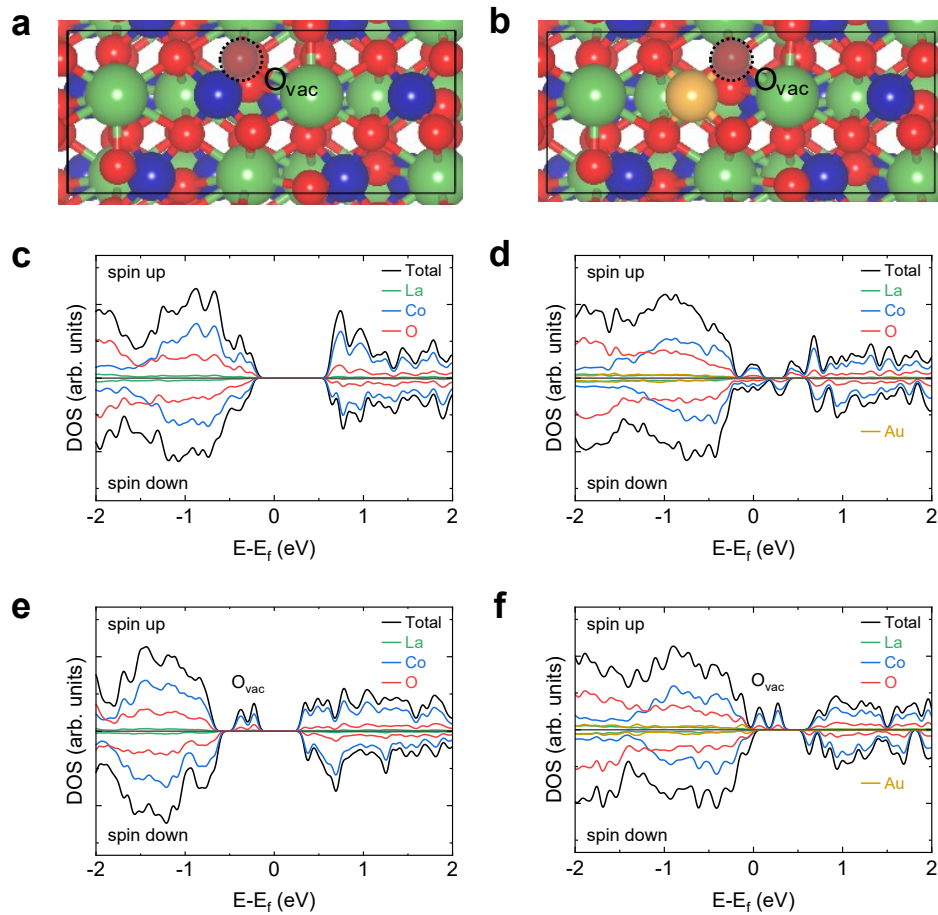

**Fig. S7 (a–d)** The atomic configurations of LCO and Au:LCO with  $O_{vac}$  and **(c–f)** Calculated DOS of LCO, Au:LCO, LCO with  $O_{vac}$ , Au:LCO with  $O_{vac}$ , respectively. Green, blue, red, and orange spheres stand for La, Co, O, and Au atoms, respectively.

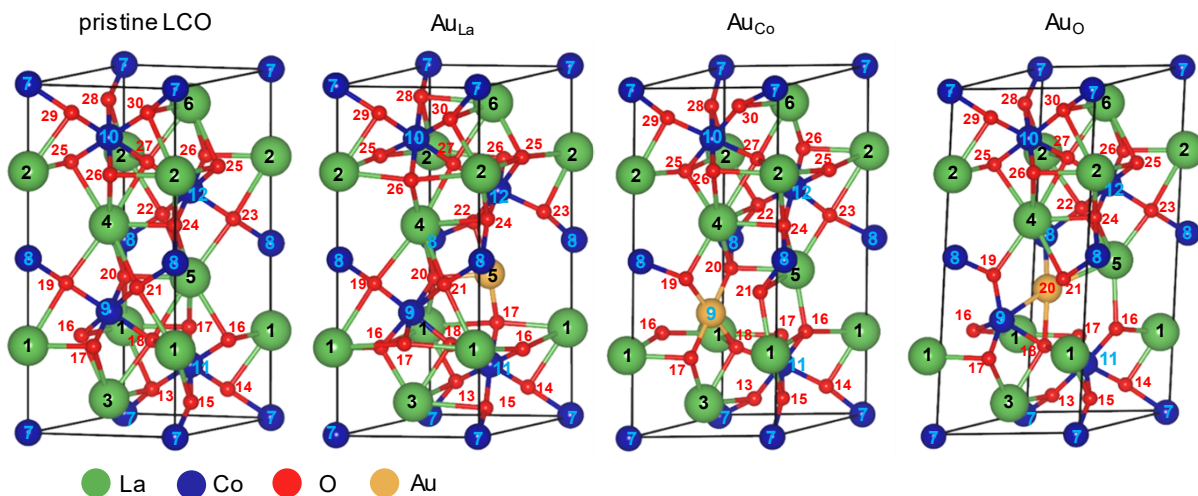

**Fig. S8** DFT-calculated relaxed configurations with corresponding atom numbers. Green, blue, red, and orange spheres stand for La, Co, O, and Au atoms, respectively.

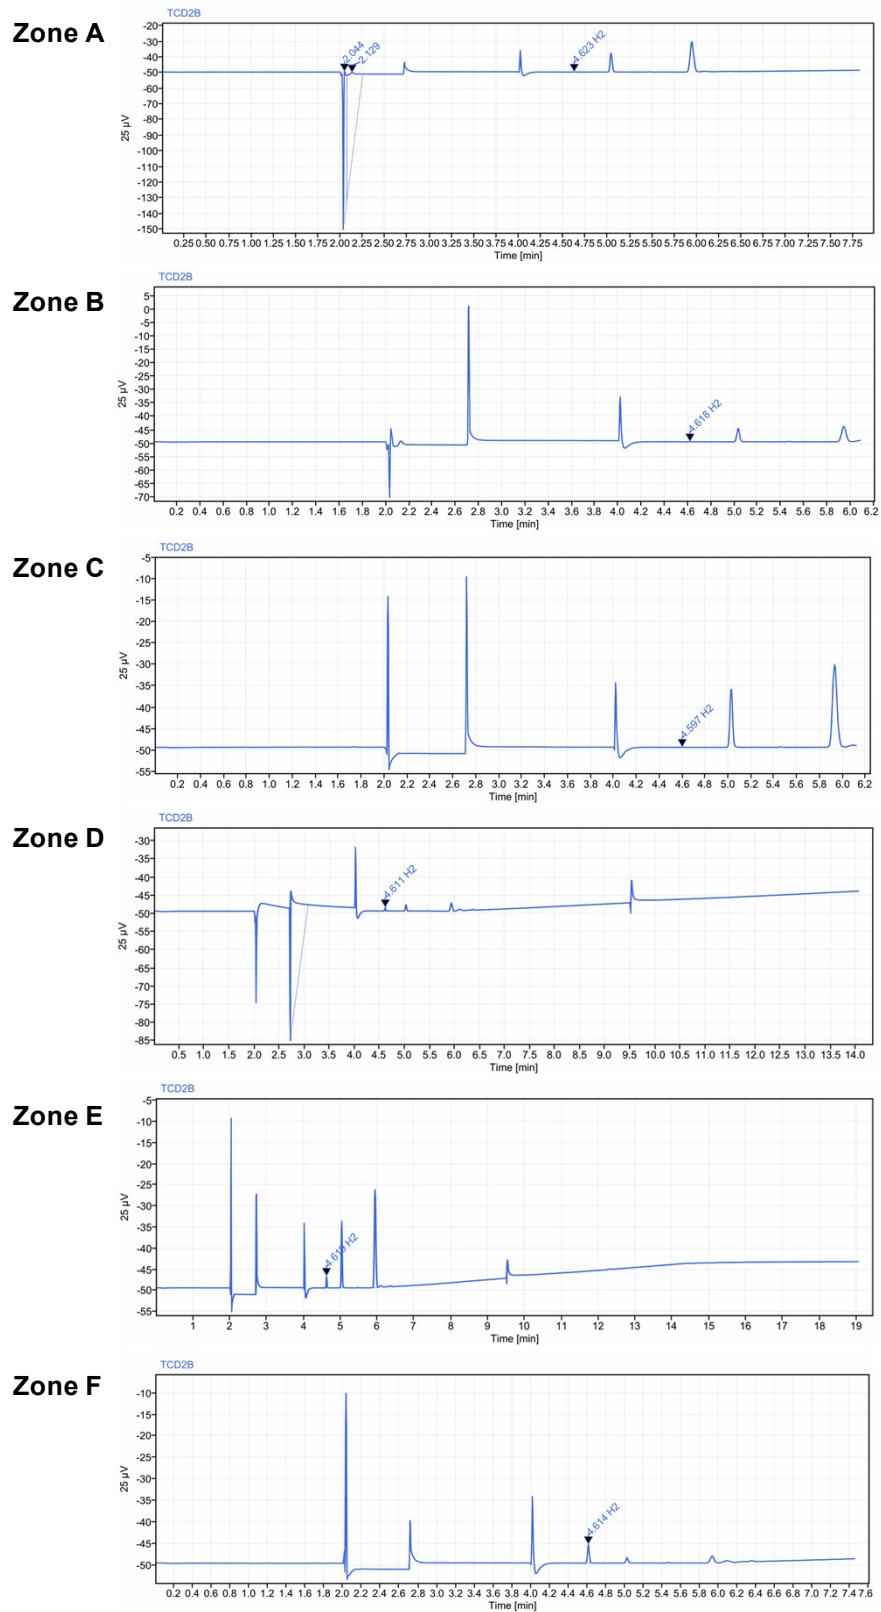

**Fig. S9** The chromatograms of the zones illustrated in Fig. 6b.

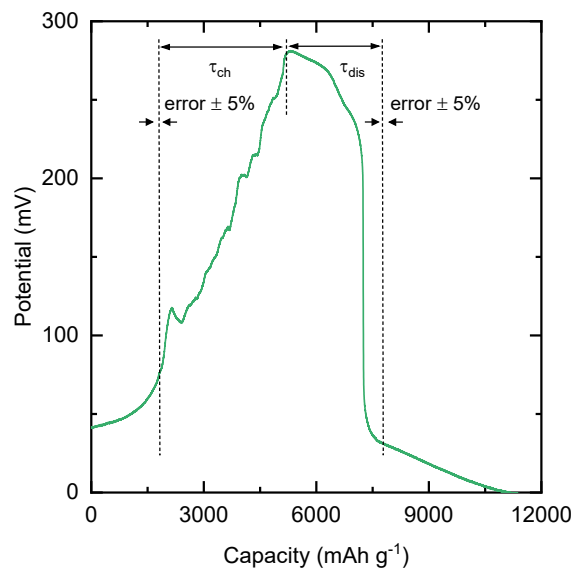

**Fig. S10** Charge and Discharge capacity profile 0.5% Au:LCO/GO (1:3) under 1 mA current for

15<sup>th</sup> cycle. Coulombic efficiency is calculated by the  $\frac{\tau_{dis}}{\tau_{ch}}$  ratio. We note that the associated uncertainty is approximately 10%, which arises from the intrinsic challenge of precisely determining the onset potentials.

---

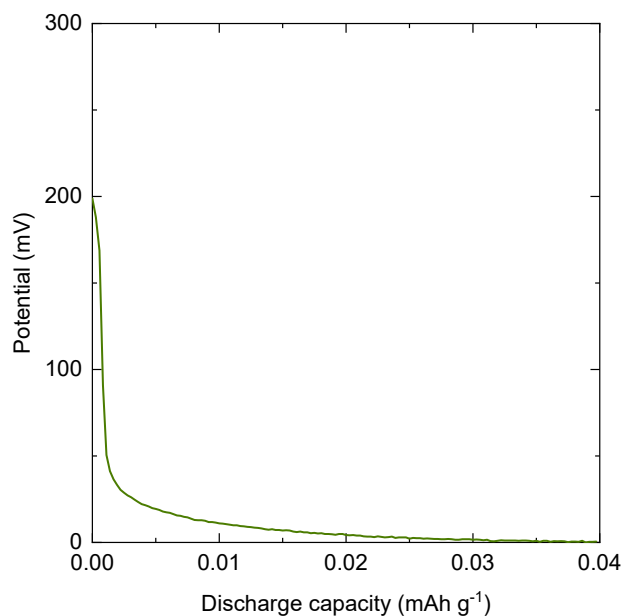

**Fig. S11** Discharge capacity profile of copper electrode under 1 mA current.

---

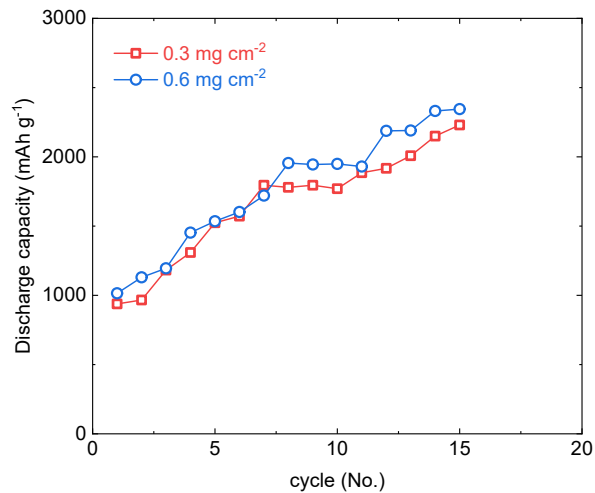

**Fig. S12** The impact of loading mass on the capacity of 0.5% Au:LCO/GO (1:3).

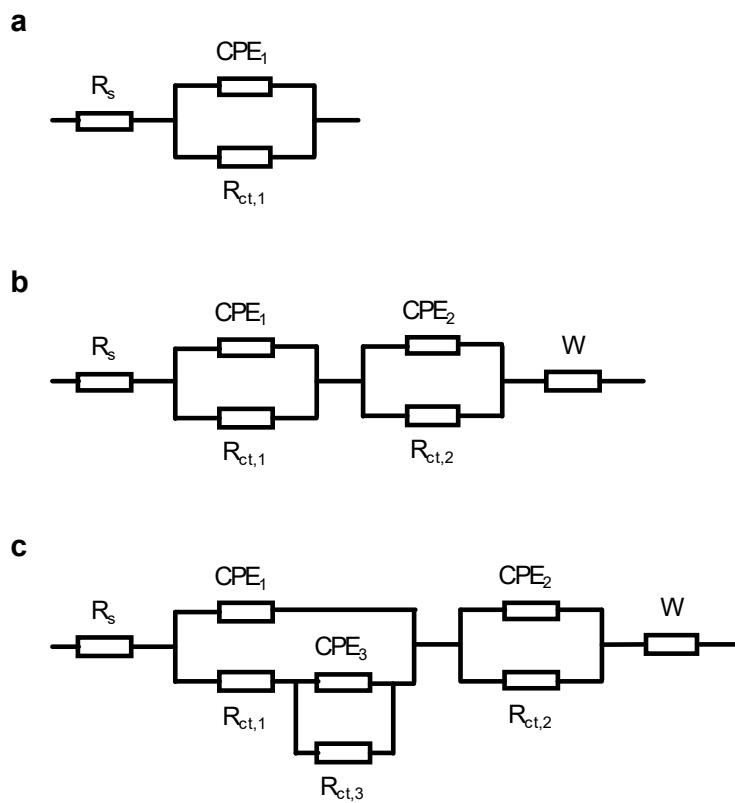

**Fig. S13** Equivalent circuits used to fit the EIS data: **(a)** GO ( $R_s + [R_{ct,1} || CPE_1]$ ), **(b)** LCO or 0.5% Au:LCO ( $R_s + [R_{ct,1} || CPE_1] + [R_{ct,2} || CPE_2]$ ), and **(c)** 0.5% Au:LCO/GO (1:3) ( $R_s + [R_{ct,1} || CPE_1] || [R_{ct,3} || CPE_3] + [R_{ct,2} || CPE_2]$ ).

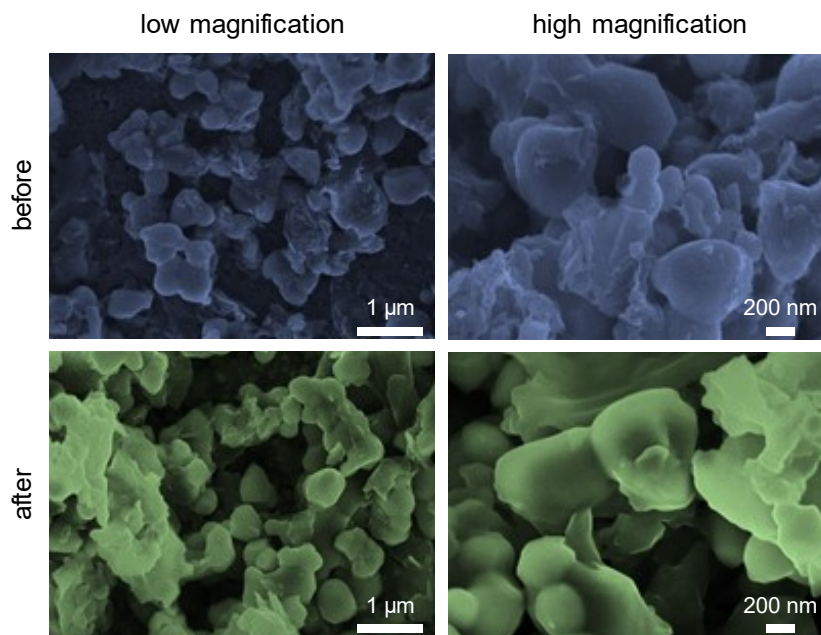

**Fig. S14** Electrode material morphology stability. FE-SEM images of the deposited 0.5% Au:LCO/GO (1:3) on Cu foam before and after stability test 15 cycling periods with different magnifications.

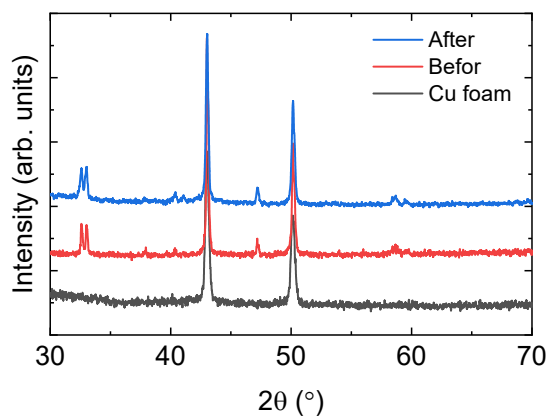

**Fig. S15** Electrode material crystal structure stability. XRD patterns of the deposited 0.5% Au:LCO/GO (1:3) on Cu foam before and after 15 cycling periods.

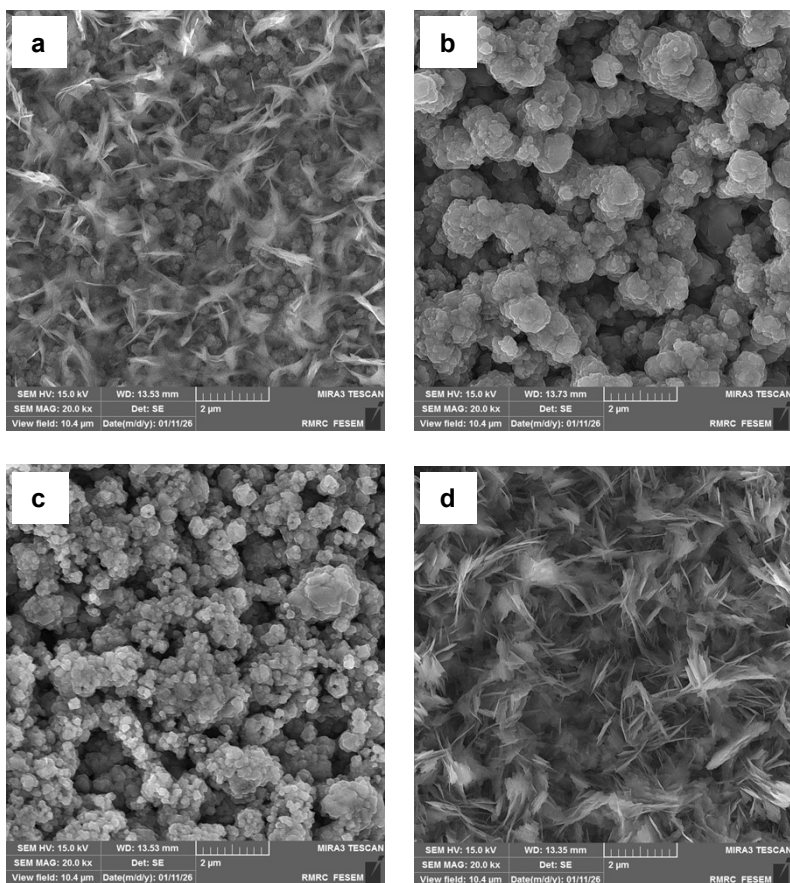

**Fig. S16 (a–d)** FE-SEM images of the 0.5% Au:LCO/GO (1:3) nanocomposite, 0.5% Au:LCO perovskite, LCO perovskite, and GO after 30 GCD cycles, respectively.

---

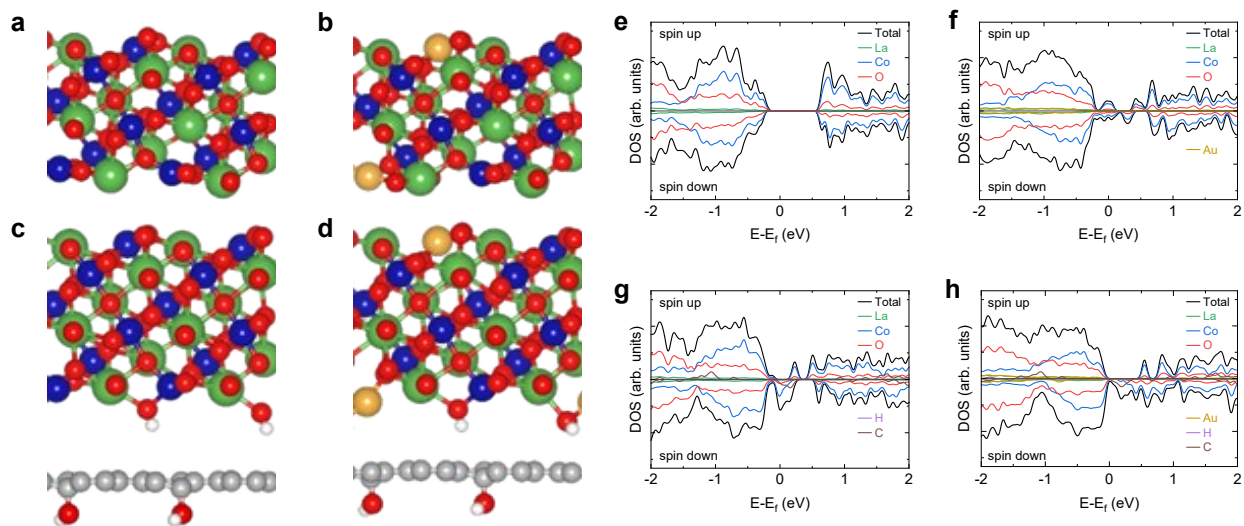

**Fig. S17 (a–d)** The atomic configurations and **(e–h)** Calculated DOS of LCO, Au:LCO, LCO/GO, and Au:LCO/GO models, respectively. It should be noted that during structural optimization, the OH group of GO spontaneously adsorbs onto the LCO or Au:LCO surfaces. It implies the nanocomposite formation can reduce GO as we observed in the experimental results. Green, blue, red, and orange spheres stand for La, Co, O, and Au atoms, respectively.

---

## Supplementary Tables

**Table S1** Reports on electrochemical hydrogen storage properties of ABO<sub>3</sub>-based electrodes. RE and N/A stand for the reference electrode and not available, respectively. We have calculated the amount of hydrogen stored  $W$  (wt%) for the reported discharge capacity  $C$  (mAh g<sup>-1</sup>) by  $W = \frac{3.6C}{F}$  where  $F$  is the Faraday constant of 96485.3 C mol<sup>-1</sup>.<sup>3</sup> Calculated values are indicated by the superscript symbol “<sup>Δ</sup>”.

| Year | Material                                                            | Electrolyte | RE      | $C$<br>(mAh g <sup>-1</sup> ) | $W$<br>(wt%)            | Ref. |
|------|---------------------------------------------------------------------|-------------|---------|-------------------------------|-------------------------|------|
| 2018 | DyFeO <sub>3</sub>                                                  | 6 M KOH     | Ag/AgCl | 2100                          | 7.8 <sup>Δ</sup>        | 4    |
| 2020 | CdSnO <sub>3</sub> /rGO                                             | 6 M KOH     | Ag/AgCl | 2550                          | 9.5 <sup>Δ</sup>        | 5    |
| 2021 | DyFeO <sub>3</sub> /ZnO                                             | 2 M KOH     | Ag/AgCl | 600.1                         | 2.2 <sup>Δ</sup>        | 6    |
| 2021 | La <sub>0.4</sub> Na <sub>0.6</sub> FeO <sub>3</sub>                | 12 M KOH    | Hg/HgO  | 356.7                         | 1.3 <sup>Δ</sup>        | 7    |
| 2021 | TbFeO <sub>3</sub> /Tb <sub>3</sub> Fe <sub>5</sub> O <sub>12</sub> | 2 M KOH     | Ag/AgCl | 490                           | 1.8 <sup>Δ</sup>        | 8    |
| 2021 | Sm <sub>0.5</sub> Sr <sub>0.5</sub> CoO <sub>3-δ</sub>              | 6 M KOH     | Hg/HgO  | 182                           | 0.7 <sup>Δ</sup>        | 9    |
| 2021 | LaFeO <sub>3</sub> /Fe <sub>2</sub> O <sub>3</sub>                  | 2 M KOH     | Ag/AgCl | 790                           | 2.9 <sup>Δ</sup>        | 10   |
| 2022 | Dy <sub>3</sub> Fe <sub>5</sub> O <sub>12</sub> /DyFeO <sub>3</sub> | 2 M KOH     | Ag/AgCl | 447                           | 1.7 <sup>Δ</sup>        | 11   |
| 2022 | LaCoO <sub>3</sub> /CoO/La <sub>2</sub> O <sub>3</sub>              | 2 M KOH     | Ag/AgCl | 1500                          | 5.6 <sup>Δ</sup>        | 12   |
| 2023 | LaTiO <sub>3</sub>                                                  | N/A         | Ag/AgCl | 1140                          | 4.1 (4.2 <sup>Δ</sup> ) | 13   |
| 2023 | GdFeO <sub>3</sub> /g-C <sub>3</sub> N <sub>4</sub>                 | 2 M KOH     | Ag/AgCl | 577                           | 2.1 <sup>Δ</sup>        | 14   |
|      | LaCrO <sub>3</sub>                                                  |             |         | 6790                          | 25.3 <sup>Δ</sup>       |      |
|      | LaMnO <sub>3</sub>                                                  |             |         | 10500                         | 39.2 <sup>Δ</sup>       |      |
| 2023 | LaFeO <sub>3</sub>                                                  | 6 M KOH     | Ag/AgCl | 13500                         | 50.4 <sup>Δ</sup>       | 15   |
|      | LaCoO <sub>3</sub>                                                  |             |         | 8800                          | 32.8 <sup>Δ</sup>       |      |
|      | LaNiO <sub>3</sub>                                                  |             |         | 7000                          | 26.2 <sup>Δ</sup>       |      |

|      |                                                             |         |         |       |                         |           |
|------|-------------------------------------------------------------|---------|---------|-------|-------------------------|-----------|
| 2023 | PrCoO <sub>3</sub> /CuO/g-C <sub>3</sub> N <sub>4</sub>     | 2 M KOH | Ag/AgCl | 1200  | 4.5 <sup>Δ</sup>        | 16        |
| 2023 | EuMnO <sub>3</sub> /EuMn <sub>2</sub> O <sub>5</sub> /MWCNT | 2 M KOH | Ag/AgCl | 382.5 | 1.4 <sup>Δ</sup>        | 17        |
| 2024 | SrMnO <sub>3</sub> /SrCO <sub>3</sub>                       | 2 M KOH | Ag/AgCl | 950   | 3.5 <sup>Δ</sup>        | 18        |
| 2024 | LaFe <sub>0.9</sub> Co <sub>0.1</sub> O <sub>3</sub>        | 9 M KOH | Hg/HgO  | 414   | 1.5 <sup>Δ</sup>        | 19        |
| 2024 | TbCrO <sub>3</sub> /montmorillonite-K10                     | 2 M KOH | Ag/AgCl | 734.3 | 2.7 <sup>Δ</sup>        | 20        |
| 2024 | Ni/LaFeO <sub>3</sub>                                       | 7 M KOH | Hg/HgO  | 375.6 | 1.4 <sup>Δ</sup>        | 21        |
| 2025 | FeMnO <sub>3</sub>                                          | 3 M KOH | Ag/AgCl | 2622  | 8.9 (9.8 <sup>Δ</sup> ) | 22        |
|      | LaCoO <sub>3</sub>                                          |         |         | 893   | 3.3                     |           |
| 2025 | LaCo <sub>1-x</sub> Au <sub>x</sub> O <sub>3</sub> /Au      | 2 M KOH | Ag/AgCl | 1264  | 4.7                     | This work |
|      | LaCo <sub>1-x</sub> Au <sub>x</sub> O <sub>3</sub> /Au/GO   |         |         | 2230  | 8.3                     |           |

---

**Table S2** Reports on doped, alloyed, and pristine LaCoO<sub>3</sub>-based perovskite-type materials used for various applications. NP, rGO, PMMA, PVA, and DFT stand for nanoparticle, reduced graphene oxide, polymethyl methacrylate, polyvinyl alcohol, density functional theory, respectively.

| Year | Material                                                                               | Dopant | Preparation method                          | Application                                            | Ref. |
|------|----------------------------------------------------------------------------------------|--------|---------------------------------------------|--------------------------------------------------------|------|
| 2002 | LaFe <sub>0.57</sub> Co <sub>0.38</sub> Pd <sub>0.05</sub> O <sub>3</sub>              | Pd     | alkoxide                                    | catalyst for automotive emissions control              | 23   |
| 2007 | La <sub>1-x</sub> Ce <sub>x</sub> CoO <sub>3</sub>                                     | Ce     | sol-gel                                     | NO oxidation                                           | 24   |
| 2008 | La <sub>1-x</sub> Sr <sub>x</sub> CoO <sub>3-δ</sub>                                   | Sr     | commercially available                      | magnetic properties in high temperature                | 25   |
| 2008 | La <sub>0.6</sub> Sr <sub>0.4</sub> Co <sub>1-y</sub> Fe <sub>y</sub> O <sub>3-δ</sub> | Fe     | sol-gel                                     | alcohol steam-reforming                                | 26   |
| 2010 | La <sub>1-x</sub> Sr <sub>x</sub> CoO <sub>3</sub>                                     | Sr     | citric acid                                 | NO <sub>x</sub> oxidation                              | 27   |
| 2012 | La <sub>0.6</sub> Ca <sub>0.4</sub> CoO <sub>3</sub>                                   | –      | sol-gel                                     | oxygen evolution reaction<br>oxygen reduction reaction | 28   |
| 2012 | La <sub>0.5</sub> Sr <sub>0.5</sub> CoO <sub>3-δ</sub>                                 | –      | pulsed laser deposition                     | solid oxide fuel cell                                  | 29   |
| 2013 | LaCoO <sub>3</sub> /Au NP                                                              | –      | PMMA-templating and PVA-protected reduction | CO and toluene oxidation                               | 30   |
| 2015 | La <sub>0.6</sub> Ca <sub>0.4</sub> Mn <sub>x</sub> Co <sub>1-x</sub> O <sub>3</sub>   | Mn     | modified Pechini process                    | oxygen evolution reaction                              | 31   |
| 2016 | La <sub>1-x</sub> Sr <sub>x</sub> CoO <sub>3-δ</sub>                                   | Sr     | infiltration and heat treatment             | solid oxide fuel cell                                  | 32   |
| 2016 | LaCoO <sub>3</sub>                                                                     | –      | sol-gel                                     | oxygen evolution reaction                              | 33   |
| 2016 | La <sub>1-x</sub> Sr <sub>x</sub> CoO <sub>3-δ</sub>                                   | Sr     | reverse-phase hydrolysis                    | oxygen evolution reaction                              | 34   |
| 2017 | LaCo <sub>3-x</sub> Fe <sub>x</sub> O <sub>3</sub>                                     | Fe     | sol-gel                                     | oxygen evolution reaction                              | 35   |

|      |                                                                                                                                             |               |                                                  |                                                                    |    |
|------|---------------------------------------------------------------------------------------------------------------------------------------------|---------------|--------------------------------------------------|--------------------------------------------------------------------|----|
| 2017 | $\text{La}_{0.5}\text{Sr}_{0.5}\text{CoO}_{3-\delta}$<br>$\text{Pr}_{0.5}\text{Ba}_{0.5}\text{CoO}_{3-\delta}$<br>$\text{SrCoO}_{3-\delta}$ | –             | solid-state<br>reaction                          | oxygen evolution reaction                                          | 36 |
| 2017 | $\text{LaCoO}_3/\text{Au NP}$                                                                                                               | –             | sol-gel                                          | photoelectrochemical water<br>splitting                            | 37 |
| 2019 | $\text{La}_{0.6}\text{Sr}_{0.4}\text{CoO}_3$                                                                                                | –             | pulsed laser<br>deposition                       | oxygen evolution reaction                                          | 38 |
| 2019 | $\text{La}_{0.2}\text{Sr}_{0.8}\text{Co}_{1-x}\text{Fe}_x\text{O}_{3-\delta}$                                                               | Fe            | flame spray<br>synthesis                         | oxygen evolution reaction                                          | 39 |
| 2019 | $\text{LaCoO}_3$                                                                                                                            | Fe            | solid-state<br>reaction                          | oxygen reduction reaction                                          | 40 |
| 2019 | $\text{LaCo}_{1-x}\text{Pt}_x\text{O}_{3-\delta}$                                                                                           | Pt            | sol-gel                                          | oxygen evolution reaction<br>hydrogen evolution reaction           | 41 |
| 2019 | $\text{La}_{1-x}\text{Sr}_x\text{CoO}_{3-\delta}$                                                                                           | Sr            | sol-gel                                          | oxygen evolution reaction                                          | 42 |
| 2020 | $\text{La}_{1-x}\text{Sr}_x\text{CoO}_{3-\delta}$                                                                                           | Sr            | pulsed laser<br>deposition                       | oxygen evolution reaction                                          | 43 |
| 2020 | $\text{La}_{0.6}\text{Sr}_{0.4}\text{CoO}_{3-\delta}$                                                                                       | –             | Pechini process                                  | solid oxide fuel cell                                              | 44 |
| 2020 | $\text{LaCo}_{0.8}\text{X}_{0.2}\text{O}_3$                                                                                                 | Al, Ni,<br>Zn | citrate route                                    | CO oxidation<br>NO oxidation<br>$\text{N}_2\text{O}$ decomposition | 45 |
| 2020 | $\text{LaCoO}_3$                                                                                                                            | Ce            | sol-gel                                          | zinc-air battery                                                   | 46 |
| 2020 | $\text{LaCo}_{1-x}\text{Ru}_x\text{O}_{3-\delta}$                                                                                           | Ru            | modified citrate<br>sol-gel<br>(Pechini process) | zinc-air battery                                                   | 47 |
| 2021 | $\text{LaCoO}_3$                                                                                                                            | –             | pulsed laser<br>deposition                       | transport and magnetic<br>properties                               | 48 |
| 2021 | $\text{La}_{1-x}\text{Ce}_x\text{CoO}$                                                                                                      | Ce            | hydrothermal                                     | hydrogen evolution reaction<br>oxygen evolution reaction           | 49 |
| 2021 | $\text{LaCoO}_3$                                                                                                                            | –             | solid-state                                      | insight into the structure of                                      | 50 |

|      |                                                                                                          |                              |                                                   |                                                                       |    |
|------|----------------------------------------------------------------------------------------------------------|------------------------------|---------------------------------------------------|-----------------------------------------------------------------------|----|
|      |                                                                                                          |                              | reaction                                          | Ruddlesden–Popper phases                                              |    |
| 2021 | $\text{La}_{1-x}\text{Ag}_x\text{CoO}_3$                                                                 | Ag                           | sodium EDTA–<br>citric acid<br>complexation       | catalytic oxidation of soot                                           | 51 |
| 2021 | $\text{La}_{0.6}\text{Sr}_{0.4}\text{Co}_{0.2}\text{Fe}_{0.8}\text{O}_{3-\delta}$                        | –                            | tape casting–<br>lamination                       | solid oxide electrochemical<br>cells                                  | 52 |
| 2021 | $\text{LaCoO}_3$                                                                                         | Fe, Cr,<br>Mn, Sc,<br>Al, In | sol-gel                                           | oxygen evolution reaction                                             | 53 |
| 2021 | $\text{LaCoO}_3$                                                                                         | Ni, Mn                       | hydrothermal                                      | oxygen evolution reaction<br>oxygen reduction reaction                | 54 |
| 2021 | $\text{La}_{0.8}\text{Sr}_{0.2}\text{Mn}_{0.5}\text{Co}_{0.5}\text{O}_3/\text{RuO}_x$                    | –                            | sol-gel                                           | zinc-air battery                                                      | 55 |
| 2021 | $\text{LaCoO}_{3-\delta}/\text{Ag NP}$                                                                   | –                            | solid-state<br>reaction                           | oxygen reduction reaction                                             | 56 |
| 2022 | $(\text{La}_{0.8}\text{Sr}_{0.2})_{0.9}\text{Co}_{0.1}\text{Fe}_{0.8}\text{Ru}_{0.1}\text{O}_{3-\delta}$ | Ru                           | solid-state<br>reaction                           | oxygen evolution reaction                                             | 57 |
| 2022 | $\text{La}_{0.9}\text{Ce}_{0.05}\text{K}_{0.05}\text{CoO}_3$                                             | Ce, K                        | sol-gel                                           | soot combustion                                                       | 58 |
| 2022 | $\text{La}_{1-x}\text{Sr}_x\text{CoO}_3$                                                                 | Sr                           | sol-gel                                           | oxygen evolution reaction                                             | 59 |
| 2022 | $\text{LaCoO}_3$                                                                                         | –                            | sol-gel                                           | propane oxidation                                                     | 60 |
| 2022 | $\text{La}_{0.6}\text{Sr}_{0.4}\text{CoO}_{3-\delta}$                                                    | –                            | pulsed laser<br>deposition                        | oxygen evolution reaction                                             | 61 |
| 2022 | $\text{La}_{1-x}\text{Sr}_x\text{CoO}_{3-\delta}$                                                        | Sr                           | pulsed laser<br>deposition                        | oxygen evolution reaction                                             | 62 |
| 2023 | $\text{LaCoO}_3$                                                                                         | –                            | solid-state<br>reaction                           | spin-triplet exciton<br>condensations at ultrahigh<br>magnetic fields | 63 |
| 2023 | $\text{La}_{0.5}\text{Ce}_{0.5}\text{CoO}_{3-\delta}$                                                    | –                            | self-propagation<br>high temperature<br>synthesis | toluene oxidation in the<br>plasma-catalytic system                   | 64 |
| 2023 | $\text{LaCoO}_3$                                                                                         | –                            | pulsed laser                                      | magnetic properties                                                   | 65 |

|      |                                                                        |                   |                                                   |                                                        |    |
|------|------------------------------------------------------------------------|-------------------|---------------------------------------------------|--------------------------------------------------------|----|
|      |                                                                        |                   | deposition                                        |                                                        |    |
| 2023 | LaCoO <sub>3</sub>                                                     | –                 | sol-gel                                           | H <sub>2</sub> S oxidation                             | 66 |
| 2023 | La <sub>0.5</sub> Sr <sub>0.5</sub> CoO <sub>3-δ</sub>                 | –                 | high-pressure-<br>oxygen<br>sputtering            | electronic transport and<br>thermal conductivity       | 67 |
| 2023 | LaCoO <sub>3</sub>                                                     | –                 | sol-gel                                           | oxygen evolution reaction                              | 68 |
| 2023 | LaCoO <sub>3</sub>                                                     | Sr, Mn            | Citrate route                                     | catalytic benzene<br>combustion                        | 69 |
| 2023 | LaCo <sub>1-x</sub> Zn <sub>x</sub> O <sub>3</sub>                     | Zn                | sol-gel                                           | oxygen evolution reaction                              | 70 |
| 2023 | LaCoO <sub>3</sub>                                                     | Ba                | self-propagating<br>high-temperature<br>synthesis | zinc-air battery                                       | 71 |
| 2023 | LaMn <sub>x</sub> Co <sub>1-x</sub> O <sub>3</sub>                     | Mn                | sol-gel                                           | nitrate reduction                                      | 72 |
| 2023 | LaCoO <sub>3</sub>                                                     | F                 | sol-gel                                           | oxygen evolution reaction<br>oxygen reduction reaction | 73 |
| 2024 | LaCoO <sub>3</sub>                                                     | –                 | pulsed laser<br>deposition                        | axon-like active signal<br>transmission                | 74 |
| 2024 | LaCoO <sub>3</sub>                                                     | –                 | sol-gel<br>hydrothermal                           | supercapacitor                                         | 75 |
| 2024 | BaGd <sub>0.3</sub> La <sub>0.7</sub> Co <sub>2</sub> O <sub>6-δ</sub> | –                 | solid-state<br>reaction                           | protonic electrical<br>conductivity                    | 76 |
| 2024 | LaCoO <sub>3</sub>                                                     | –                 | pulsed laser<br>deposition                        | true random number<br>generation                       | 77 |
| 2024 | LaCoO <sub>3</sub>                                                     | –                 | sol-gel<br>autocombustion                         | CO oxidation                                           | 78 |
| 2024 | LaCoO <sub>3</sub>                                                     | Ca                | hydrothermal                                      | oxygen evolution reaction                              | 79 |
| 2024 | LaCoO <sub>3</sub>                                                     | Mn, Cr,<br>Fe, Ti | DFT calculations                                  | oxygen evolution reaction<br>oxygen reduction reaction | 80 |
| 2024 | La <sub>1-x</sub> Sr <sub>x</sub> CoO <sub>3-δ</sub>                   | Sr                | solid-state                                       | electric transport                                     | 81 |

|      |                                                                                                                    |    | reaction |                                  |           |
|------|--------------------------------------------------------------------------------------------------------------------|----|----------|----------------------------------|-----------|
| 2024 | $\text{LaCo}_{0.9}\text{O}_{3-\delta}$                                                                             | –  | sol-gel  | CO oxidation                     | 82        |
| 2024 | $\text{La}_{0.6}\text{Sr}_{0.4}\text{CoO}_3$                                                                       | –  | sol-gel  | oxygen evolution reaction        | 83        |
| 2025 | $\text{LaCoO}_3$                                                                                                   | –  | sol-gel  | atrazine degradation in water    | 84        |
| 2025 | $\text{LaCo}_{1-x}\text{Au}_x\text{O}_3/\text{Au}$<br>$\text{LaCo}_{1-x}\text{Au}_x\text{O}_3/\text{Au}/\text{GO}$ | Au | sol-gel  | electrochemical hydrogen storage | This work |

**Table S3** Reports on  $\text{LaCoO}_3$ -based perovskite-type composite electrodes used for electrochemical applications. AB, MWCNT, and rGO stand for acetylene black, multi-walled carbon nanotubes, reduced graphene oxide, respectively.

| Year | Material                                                                                                            | Preparation method       | Application                                            | Ref.         |
|------|---------------------------------------------------------------------------------------------------------------------|--------------------------|--------------------------------------------------------|--------------|
| 2016 | LaCoO <sub>3</sub> /rGO                                                                                             | sol-gel                  | lithium-oxygen battery                                 | 85           |
| 2017 | LaCoO <sub>3</sub> /N:rGO                                                                                           | sol-gel                  | oxygen evolution reaction<br>oxygen reduction reaction | 86           |
| 2021 | La <sub>0.5</sub> Ca <sub>0.5</sub> CoO <sub>3-δ</sub> /rGO                                                         | modified citrate         | zinc-air battery                                       | 87           |
| 2022 | LaCoO <sub>3</sub> /rGO                                                                                             | solvothermal             | supercapacitor                                         | 88           |
| 2022 | LaCoO <sub>3</sub> /rGO                                                                                             | precipitation-deposition | water-gas shift reaction                               | 89           |
| 2022 | LaCoO <sub>3</sub> /rGO                                                                                             | sol-gel                  | supercapacitor                                         | 90           |
| 2023 | LaCoO <sub>3</sub> /rGO                                                                                             | sol-gel                  | oxygen evolution reaction<br>oxygen reduction reaction | 91           |
|      | LaCoO <sub>3</sub> /AB                                                                                              |                          |                                                        |              |
| 2024 | LaCoO <sub>3</sub> /MWCNT<br>LaCoO <sub>3</sub> /rGO                                                                | sol-gel                  | oxygen evolution reaction                              | 92           |
|      | LaCoO <sub>3</sub>                                                                                                  |                          |                                                        |              |
| 2025 | LaCo <sub>1-x</sub> Au <sub>x</sub> O <sub>3</sub> /Au<br>LaCo <sub>1-x</sub> Au <sub>x</sub> O <sub>3</sub> /Au/GO | sol-gel                  | electrochemical hydrogen<br>storage                    | This<br>work |

**Table S4** BET data of the LCO and 0.5% Au:LCO samples.

| Sample | BET<br>surface area | Total<br>volume | Average<br>diameter |
|--------|---------------------|-----------------|---------------------|
|--------|---------------------|-----------------|---------------------|

|             | (m <sup>2</sup> g <sup>-1</sup> ) | (cm <sup>3</sup> g <sup>-1</sup> ) | (nm) |
|-------------|-----------------------------------|------------------------------------|------|
| LCO         | 22.3                              | 0.040                              | 6.9  |
| 0.5% Au:LCO | 67.2                              | 0.089                              | 5.3  |

**Table S5** Peak positions of the XPS fitted Co 2*p* spectra of LCO and 0.5% Au:LCO. FWHMs are written inside the parentheses.

| LCO                              |                                  | 0.5% Au:LCO                      |                                  |
|----------------------------------|----------------------------------|----------------------------------|----------------------------------|
| Co 2 <i>p</i> multiplets<br>(eV) | Co 2 <i>p</i> satellites<br>(eV) | Co 2 <i>p</i> multiplets<br>(eV) | Co 2 <i>p</i> satellites<br>(eV) |
| 778.96<br>(1.94)                 | 785.98<br>(3.51)                 | 779.09<br>(1.75)                 | 786.12<br>(3.94)                 |
| 780.18<br>(2.05)                 | 789.91<br>(4.12)                 | 780.03<br>(2.19)                 | 789.76<br>(3.25)                 |
| 781.76<br>(2.94)                 | 800.97<br>(5.15)                 | 781.72<br>(2.83)                 | 801.11<br>(4.51)                 |
| 783.88<br>(2.37)                 | 805.55<br>(5.99)                 | 784.02<br>(2.16)                 | 804.96<br>(5.99)                 |
| 793.95<br>(2.20)                 |                                  | 794.08<br>(2.16)                 |                                  |
| 795.17<br>(2.15)                 |                                  | 795.24<br>(2.42)                 |                                  |
| 796.74<br>(2.4)                  |                                  | 796.71<br>(2.71)                 |                                  |
| 798.87<br>(1.90)                 |                                  | 799.01<br>(1.99)                 |                                  |

**Table S6** Lattice parameters of optimized LCO unit cell and three possible Au-substituted configurations by r<sup>2</sup>SCAN.

| System                  | Magnetic moment<br>( $\mu\text{B}$ ) | Configuration                                    | $a$ ( $\text{\AA}$ ) | $b$ ( $\text{\AA}$ ) | $c$ ( $\text{\AA}$ ) |
|-------------------------|--------------------------------------|--------------------------------------------------|----------------------|----------------------|----------------------|
| LCO                     | 0.00                                 | $\text{La}_6\text{Co}_6\text{O}_{18}$            | 5.428                | 5.441                | 13.039               |
| $\text{Au}_{\text{La}}$ | 4.00                                 | $\text{Au}_1\text{La}_5\text{Co}_6\text{O}_{18}$ | 5.359                | 5.356                | 13.308               |
| $\text{Au}_{\text{Co}}$ | 0.00                                 | $\text{Au}_1\text{La}_6\text{Co}_5\text{O}_{18}$ | 5.341                | 5.513                | 13.638               |
| $\text{Au}_{\text{O}}$  | 3.00                                 | $\text{Au}_1\text{La}_6\text{Co}_6\text{O}_{17}$ | 5.449                | 5.563                | 13.710               |

**Table S7** Calculated  $\Delta H_{cal}$  of possible secondary phases by r<sup>2</sup>SCAN.

| Materials               | Space group  | $\Delta H_{cal}$ (eV) | Materials                             | Space group | $\Delta H_{cal}$ (eV) |
|-------------------------|--------------|-----------------------|---------------------------------------|-------------|-----------------------|
| $\text{Co}_3\text{O}_4$ | $Fd\bar{3}m$ | -9.42                 | $\text{La}_2\text{CoO}_4$             | $I4/mmm$    | -20.84                |
| $\text{CoO}_2$          | $R\bar{3}m$  | -2.91                 | $\text{La}_4(\text{CoO}_3)_3$         | $Pnma$      | -43.88                |
| $\text{CoO}$            | $F\bar{4}3m$ | -2.20                 | $\text{La}_4\text{Co}_3\text{O}_{10}$ | $P2_1/c$    | -47.05                |
| $\text{La}_2\text{O}_3$ | $P\bar{3}m1$ | -18.78                | $\text{La}_2\text{Co}_2\text{O}_5$    | $Pnma$      | -22.95                |
| $\text{LaO}_2$          | $P2_1/m$     | -8.77                 | $\text{La}_3\text{Co}_3\text{O}_8$    | $P2_1$      | -36.04                |
| $\text{LaO}_3$          | $P6_1/m$     | -7.08                 | $\text{Au}_2\text{O}_3$               | $Fdd2$      | -0.84                 |
| $\text{LaCoO}_3$        | $R\bar{3}c$  | -13.02                |                                       |             |                       |

**Table S8** Bader charge analysis for pristine and Au-doped LCO for  $\text{Au}_{\text{La}}$ ,  $\text{Au}_{\text{Co}}$ , and  $\text{Au}_{\text{O}}$  substitutions.

| No. | Pristine |      |       | Au <sub>La</sub> |             |              | Au <sub>Co</sub> |             |              | Au <sub>O</sub> |              |              |
|-----|----------|------|-------|------------------|-------------|--------------|------------------|-------------|--------------|-----------------|--------------|--------------|
|     | Atom     | V.E. | Q.    | Atom             | V.E.        | Q.           | Atom             | V.E.        | Q.           | Atom            | V.E.         | Q.           |
| 1   | La       | 8.85 | +2.15 | La               | 8.85        | +2.15        | La               | 8.86        | +2.14        | <b>La</b>       | <b>8.91</b>  | <b>+2.09</b> |
| 2   | La       | 8.85 | +2.15 | La               | 8.85        | +2.15        | La               | 8.84        | +2.16        | La              | 8.84         | +2.16        |
| 3   | La       | 8.85 | +2.15 | La               | 8.82        | +2.18        | La               | 8.85        | +2.15        | La              | 8.86         | +2.14        |
| 4   | La       | 8.85 | +2.15 | <b>Au</b>        | <b>9.93</b> | <b>+1.07</b> | La               | 8.85        | +2.15        | La              | 8.87         | +2.13        |
| 5   | La       | 8.85 | +2.15 | La               | 8.85        | +2.15        | La               | 8.86        | +2.14        | <b>La</b>       | <b>8.98</b>  | <b>+2.02</b> |
| 6   | La       | 8.85 | +2.15 | Co               | 7.58        | +1.42        | La               | 8.85        | +2.15        | La              | 8.84         | +2.16        |
| 7   | Co       | 7.58 | +1.42 | Co               | 7.60        | +1.40        | Co               | 7.58        | +1.42        | Co              | 7.59         | +1.41        |
| 8   | Co       | 7.58 | +1.42 | <b>Co</b>        | <b>7.52</b> | <b>+1.48</b> | Co               | 7.58        | +1.42        | <b>Co</b>       | <b>7.84</b>  | <b>+1.16</b> |
| 9   | Co       | 7.58 | +1.42 | Co               | 7.58        | +1.42        | <b>Au</b>        | <b>9.96</b> | <b>+1.04</b> | <b>Co</b>       | <b>7.84</b>  | <b>+1.16</b> |
| 10  | Co       | 7.58 | +1.42 | Co               | 7.59        | +1.41        | Co               | 7.57        | +1.43        | Co              | 7.58         | +1.42        |
| 11  | Co       | 7.58 | +1.42 | Co               | 7.57        | +1.43        | Co               | 7.58        | +1.42        | Co              | 7.60         | +1.40        |
| 12  | Co       | 7.58 | +1.42 | La               | 8.85        | +2.15        | Co               | 7.58        | +1.42        | Co              | 7.61         | +1.39        |
| 13  | O        | 7.19 | -1.19 | O                | 7.19        | -1.19        | O                | 7.20        | -1.20        | O               | 7.18         | -1.18        |
| 14  | O        | 7.19 | -1.19 | O                | 7.18        | -1.18        | O                | 7.19        | -1.19        | O               | 7.21         | -1.21        |
| 15  | O        | 7.20 | -1.20 | O                | 7.19        | -1.19        | O                | 7.21        | -1.21        | O               | 7.22         | -1.22        |
| 16  | O        | 7.19 | -1.19 | O                | 7.16        | -1.16        | O                | 7.18        | -1.18        | O               | 7.23         | -1.23        |
| 17  | O        | 7.20 | -1.20 | <b>O</b>         | <b>7.03</b> | <b>-1.03</b> | <b>O</b>         | <b>7.08</b> | <b>-1.08</b> | O               | 7.17         | -1.17        |
| 18  | O        | 7.19 | -1.19 | O                | 7.14        | -1.14        | <b>O</b>         | <b>7.07</b> | <b>-1.07</b> | O               | 7.17         | -1.17        |
| 19  | O        | 7.19 | -1.19 | <b>O</b>         | <b>7.03</b> | <b>-1.03</b> | <b>O</b>         | <b>7.07</b> | <b>-1.07</b> | O               | 7.16         | -1.16        |
| 20  | O        | 7.20 | -1.20 | <b>O</b>         | <b>7.04</b> | <b>-1.04</b> | <b>O</b>         | <b>7.08</b> | <b>-1.08</b> | <b>Au</b>       | <b>11.28</b> | <b>-0.28</b> |
| 21  | O        | 7.19 | -1.19 | <b>O</b>         | <b>6.98</b> | <b>-0.98</b> | O                | 7.18        | -1.18        | O               | 7.19         | -1.19        |
| 22  | O        | 7.19 | -1.19 | <b>O</b>         | <b>7.02</b> | <b>-1.02</b> | O                | 7.21        | -1.21        | O               | 7.23         | -1.23        |
| 23  | O        | 7.19 | -1.19 | O                | 7.12        | -1.12        | O                | 7.19        | -1.19        | O               | 7.22         | -1.22        |
| 24  | O        | 7.20 | -1.20 | O                | 7.17        | -1.17        | O                | 7.21        | -1.21        | O               | 7.21         | -1.21        |
| 25  | O        | 7.19 | -1.19 | O                | 7.17        | -1.17        | O                | 7.19        | -1.19        | O               | 7.19         | -1.19        |
| 26  | O        | 7.20 | -1.20 | O                | 7.21        | -1.21        | O                | 7.21        | -1.21        | O               | 7.20         | -1.20        |
| 27  | O        | 7.19 | -1.19 | O                | 7.19        | -1.19        | O                | 7.19        | -1.19        | O               | 7.19         | -1.19        |
| 28  | O        | 7.20 | -1.20 | O                | 7.22        | -1.22        | O                | 7.21        | -1.21        | O               | 7.19         | -1.19        |
| 29  | O        | 7.19 | -1.19 | O                | 7.19        | -1.19        | O                | 7.19        | -1.19        | O               | 7.19         | -1.19        |
| 30  | O        | 7.19 | -1.19 | O                | 7.19        | -1.19        | O                | 7.19        | -1.19        | O               | 7.20         | -1.20        |

Number of valance electron (V.E.) and Charge (Q.) in unit C

**Table S9** The amount of H<sub>2</sub> evolved during the GCD processes corresponding to the conditions illustrated in Fig. 6b.

| Zone in Fig. 6b |              | Amount of H <sub>2</sub> (ppm) |
|-----------------|--------------|--------------------------------|
| Zone A          | Not detected |                                |
| Zone B          | Not detected |                                |
| Zone C          | Not detected |                                |
| Point D         | 6            |                                |
| Point E         | 26           |                                |
| Zone F          | 54           |                                |

**Table S10** The values of fitted elements for the utilized equivalent circuits,  $R_s + [R_{ct,1}||CPE_1]$ ,  $R_s + [R_{ct,1}||CPE_1] + [R_{ct,2}||CPE_2]$ , and  $R_s + [R_{ct,1}||CPE_1]||[R_{ct,3}||CPE_3] + [R_{ct,2}||CPE_2]$ .

| GO                      |                      | LCO                     |                      | 0.5% Au:LCO             |                      | 0.5% Au:LCO/GO (1:3)    |                      |
|-------------------------|----------------------|-------------------------|----------------------|-------------------------|----------------------|-------------------------|----------------------|
| Elements                | Values               | Elements                | Values               | Elements                | Values               | Elements                | Values               |
| $R_s$ ( $\Omega$ )      | 1.2                  | $R_s$ ( $\Omega$ )      | 0.13                 | $R_s$ ( $\Omega$ )      | 0.22                 | $R_s$ ( $\Omega$ )      | 0.71                 |
| $R_{ct,1}$ ( $\Omega$ ) | 131                  | $R_{ct,1}$ ( $\Omega$ ) | 79.0                 | $R_{ct,1}$ ( $\Omega$ ) | 53.5                 | $R_{ct,1}$ ( $\Omega$ ) | 0.02                 |
| $P_1$ (F)               | $4.8 \times 10^{-3}$ | $R_{ct,2}$ ( $\Omega$ ) | 45.8                 | $R_{ct,2}$ ( $\Omega$ ) | 92.0                 | $R_{ct,2}$ ( $\Omega$ ) | 277.8                |
| $n_1$                   | 0.84                 | $P_1$ (F)               | $2.7 \times 10^{-4}$ | $P_1$ (F)               | $3.0 \times 10^{-4}$ | $R_{ct,3}$ ( $\Omega$ ) | 21.7                 |
|                         |                      | $n_1$                   | 0.87                 | $n_1$                   | 0.77                 | $P_1$ (F)               | $7.0 \times 10^{-4}$ |
|                         |                      | $P_2$ (F)               | $4.3 \times 10^{-3}$ | $P_2$ (F)               | $9.3 \times 10^{-3}$ | $n_1$                   | 0.50                 |
|                         |                      | $n_2$                   | 0.87                 | $n_2$                   | 0.61                 | $P_2$ (F)               | $4.4 \times 10^{-2}$ |
|                         |                      | $W$ ( $\Omega$ )        | 53.2                 | $W$ ( $\Omega$ )        | 41.0                 | $n_2$                   | 0.86                 |
|                         |                      |                         |                      |                         |                      | $P_3$ (F)               | $4.5 \times 10^{-3}$ |
|                         |                      |                         |                      |                         |                      | $n_3$                   | 0.78                 |
|                         |                      |                         |                      |                         |                      | $W$ ( $\Omega$ )        | 0.1                  |

### Supplementary References

1. T. Ofoegbuna, P. Darapaneni, S. Sahu, C. Plaisance and J. A. Dorman, *Nanoscale*, 2019, **11**, 14303-14311.

2. H. Sadabadi, S. R. Allahkaram, A. Kordijazi, O. Akbarzadeh and P. K. Rohatgi, *Eng. Rep.*, 2021, **3**, e12335.
3. X. L. Xu, Y. Dong, Q. W. Hu, N. Si and C. W. Zhang, *Energ Fuel*, 2024, **38**, 7579-7613.
4. A. Salehabadi, M. Salavati-Niasari, T. Gholami and A. Khoobi, *Int. J Hydrogen Energ.*, 2018, **43**, 9713-9721.
5. M. Masjedi-Arani, M. Ghiyasiyan-Arani, O. Amiri and M. Salavati-Niasari, *Ultrason. Sonochem.*, 2020, **61**, 104840.
6. M. Baladi, M. Valian, M. Ghiyasiyan-Arani and M. Salavati-Niasari, *Int. J. Hydrogen. Energ.*, 2021, **46**, 21026-21039.
7. K. Ren, Z. Duan, Y. Li, L. Zhang and S. Han, *J. Electrochem. Soc.*, 2021, **168**, 043501.
8. P. Mehdizadeh, M. Masjedi-Arani, O. Amiri and M. Salavati-Niasari, *Fuel*, 2021, **304**, 121412.
9. A. Bhardwaj, H. Bae, I.-H. Kim, L. Mathur, J.-Y. Park and S.-J. Song, *J. Electrochem. Soc.*, 2021, **168**, 070540.
10. P. Mehdizadeh, M. Masjedi-Arani and M. Salavati-Niasari, *Int. J. Hydrogen. Energ.*, 2021, **46**, 17253-17266.
11. S. Alinavaz, M. Ghiyasiyan-Arani and M. Salavati-Niasari, *Fuel*, 2022, **324**, 124600.
12. P. Mehdizadeh, M. Masjedi-Arani, O. Amiri, A. Al-Nayili and M. Salavati-Niasari, *Fuel*, 2022, **311**, 122544.
13. M. Valian, A. Salehabadi and M. Salavati-Niasari, *Int. J. Hydrogen. Energ.*, 2023, **48**, 4762-4772.
14. R. Mohassel, M. Shabani-Nooshabadi and M. Salavati-Niasari, *Int. J. Hydrogen. Energ.*, 2023, **48**, 6586-6596.
15. M. Ostadebrahim and O. Moradlou, *J. Energy Storage*, 2023, **72**, 108284.
16. M. Baladi, E. A. Dawi and M. Salavati-Niasari, *J. Energy Storage*, 2023, **63**, 106999.
17. Z. Heydariyan, R. Monsef, E. A. Dawi and M. Salavati-Niasari, *Fuel*, 2023, **351**, 128885.
18. S. A. Ehsanizadeh, A. S. Abbas, F. S. Razavi, E. A. Dawi, A. M. M. Ibrahim and M. Salavati-Niasari, *Int. J. Hydrogen. Energ.*, 2024, **60**, 392-401.

19. S. Sun, G. Zhang, Z. Yang, L. Bai, Y. Li, Z. Liu, J. Xu, R. Guo and Y. Zhang, *Ceram. Int.*, 2024, **50**, 42176-42187.
20. Z. Heydariyan, M. Salavati-Niasari and R. Monsef, *Fuel*, 2024, **372**, 132177.
21. J. Xu, G. Zhang, X. Zhao, F. Hu and D. Ke, *Nano Select*, 2024, **5**, 2300091.
22. S. Abdollah Lachini, A. Eslami and Q. Chu, *J. Alloy Compd.*, 2025, **1010**, 177486.
23. Y. Nishihata, J. Mizuki, T. Akao, H. Tanaka, M. Uenishi, M. Kimura, T. Okamoto and N. Hamada, *Nature*, 2002, **418**, 164-167.
24. Y. Wen, C. Zhang, H. He, Y. Yu and Y. Teraoka, *Catal. Today*, 2007, **126**, 400-405.
25. D. Baskar and S. B. Adler, *Chem. Mater.*, 2008, **20**, 2624-2628.
26. M. M. Natile, F. Poletto, A. Galenda, A. Glisenti, T. Montini, L. De Rogatis and P. Fornasiero, *Chem. Mater.*, 2008, **20**, 2314-2327.
27. C. H. Kim, G. Qi, K. Dahlberg and W. Li, *Science*, 2010, **327**, 1624-1627.
28. S. Malkhandi, B. Yang, A. K. Manohar, A. Manivannan, G. K. Prakash and S. R. Narayanan, *J. Phys. Chem. Lett.*, 2012, **3**, 967-972.
29. Y. M. Kim, J. He, M. D. Biegalski, H. Ambaye, V. Lauter, H. M. Christen, S. T. Pantelides, S. J. Pennycook, S. V. Kalinin and A. Y. Borisevich, *Nat. Mater.*, 2012, **11**, 888-894.
30. X. W. Li, H. X. Dai, J. G. Deng, Y. X. Liu, S. H. Xie, Z. X. Zhao, Y. Wang, G. S. Guo and H. Arandiyani, *Chem. Eng. J.*, 2013, **228**, 965-975.
31. S. Malkhandi, P. Trinh, A. K. Manohar, A. Manivannan, M. Balasubramanian, G. K. S. Prakash and S. R. Narayanan, *J. Phys. Chem. C.*, 2015, **119**, 8004-8013.
32. K. Tamm, P. Möller, G. Nurk and E. Lust, *J. Electrochem. Soc.*, 2016, **163**, F586-F592.
33. S. Zhou, X. Miao, X. Zhao, C. Ma, Y. Qiu, Z. Hu, J. Zhao, L. Shi and J. Zeng, *Nat. Commun.*, 2016, **7**, 11510.
34. J. T. Mefford, X. Rong, A. M. Abakumov, W. G. Hardin, S. Dai, A. M. Kolpak, K. P. Johnston and K. J. Stevenson, *Nat. Commun.*, 2016, **7**, 11053.
35. Y. Duan, S. N. Sun, S. B. Xi, X. Ren, Y. Zhou, G. L. Zhang, H. T. Yang, Y. H. Du and Z. C. J. Xu, *Chem. Mater.*, 2017, **29**, 10534-10541.

36. A. Grimaud, O. Diaz-Morales, B. Han, W. T. Hong, Y. L. Lee, L. Giordano, K. A. Stoerzinger, M. T. M. Koper and Y. Shao-Horn, *Nat. Chem.*, 2017, **9**, 457-465.
37. B. T. Zhang, J. Liu, S. Z. Yue, Y. G. Teng, Z. J. Wang, X. B. Li, S. C. Qu and Z. G. Wang, *Appl. Catal. B*, 2017, **219**, 432-438.
38. M. L. Weber, C. Baeumer, D. N. Mueller, L. Jin, C. L. Jia, D. S. Bick, R. Waser, R. Dittmann, I. Valov and F. Gunkel, *Chem. Mater.*, 2019, **31**, 2337-2346.
39. B. J. Kim, E. Fabbri, D. F. Abbott, X. Cheng, A. H. Clark, M. Nachtegaal, M. Borlaf, I. E. Castelli, T. Graule and T. J. Schmidt, *J. Am. Chem. Soc.*, 2019, **141**, 5231-5240.
40. M. Wang, B. Han, J. Deng, Y. Jiang, M. Zhou, M. Lucero, Y. Wang, Y. Chen, Z. Yang, A. T. N'Diaye, Q. Wang, Z. J. Xu and Z. Feng, *ACS Appl. Mater. Interfaces*, 2019, **11**, 5682-5686.
41. C. Wang, L. Zeng, W. Guo, C. Gong and J. Yang, *Rsc Adv*, 2019, **9**, 35646-35654.
42. Y. Lu, A. J. Ma, Y. F. Yu, R. Tan, C. W. Liu, P. Zhang, D. Liu and J. Z. Gui, *ACS Sustain. Chem. Eng.*, 2019, **7**, 2906-2910.
43. A. Boucly, E. Fabbri, L. Artiglia, X. Cheng, D. Pergolesi, M. Ammann and T. J. Schmidt, *Chem. Mater.*, 2020, **32**, 5256-5263.
44. Y. P. Ivanov, M. Kubicek, M. Siebenhofer, A. Viernstein, H. Hutter, J. Fleig, A. Chuvilin and Z. Zhang, *Commun. Mater.*, 2020, **1**, 25.
45. J. Simbock, M. Ghiasi, S. Schonebaum, U. Simon, F. M. F. de Groot and R. Palkovits, *Nat. Commun.*, 2020, **11**, 652.
46. J. M. Qian, T. T. Wang, Z. M. Zhang, Y. G. Liu, J. F. Li and D. Q. Gao, *Nano Energy*, 2020, **74**, 104948.
47. S. G. Chandrappa, P. Moni, D. Chen, G. Karkera, K. R. Prakasha, R. A. Caruso and A. S. Prakash, *J. Mater. Chem. A*, 2020, **8**, 20612-20620.
48. M. Meng, Y. Sun, Y. Li, Q. An, Z. Wang, Z. Lin, F. Yang, X. Zhu, P. Gao and J. Guo, *Nat. Commun.*, 2021, **12**, 2447.
49. D. Ji, C. Liu, Y. Yao, L. Luo, W. Wang and Z. Chen, *Nanoscale*, 2021, **13**, 9952-9959.

50. Y. Hong, P. Byeon, J. Bak, Y. Heo, H. S. Kim, H. B. Bae and S. Y. Chung, *Nat. Commun.*, 2021, **12**, 5527.
51. L. J. He, Y. Zhang, Y. C. Zang, C. X. Liu, W. C. Wang, R. Han, N. Ji, S. T. Zhang and Q. L. Liu, *Acs Catal.*, 2021, **11**, 14224-14236.
52. J. Lee, M. Kim, Y. Lee and J. H. Joo, *Chem. Mater.*, 2021, **33**, 6290-6298.
53. T. G. Yun, Y. Heo, H. Bin Bae and S. Y. Chung, *Nat. Commun.*, 2021, **12**, 824.
54. J. Sun, L. Du, B. Y. Sun, G. K. Han, Y. L. Ma, J. J. Wang, H. Huo, P. J. Zuo, C. Y. Du and G. P. Yin, *J. Energy Chem.*, 2021, **54**, 217-224.
55. Y. Dai, J. Yu, Z. Zhang, S. Zhai, C. Cheng, S. Zhao, P. Tan, Z. Shao and M. Ni, *ACS Appl. Mater. Interfaces*, 2021, **13**, 61098-61106.
56. Y. Liang, D. D. Ye, N. Han, P. Liang, J. Q. Wang, G. J. Yang, C. K. Zhang, X. He, M. Chen and C. Zhang, *Electrochim. Acta*, 2021, **391**, 138908.
57. Y. Liang, Y. Cui, Y. Chao, N. Han, J. Sunarso, P. Liang, X. He, C. Zhang and S. M. Liu, *Nano Res.*, 2022, **15**, 6977-6986.
58. D. Yu, L. Y. Wang, C. L. Zhang, C. Peng, X. H. Yu, X. Q. Fan, B. Liu, K. X. Li, Z. G. Li, Y. C. Wei, J. Liu and Z. Zhao, *Acs Catal.*, 2022, **12**, 15056-15075.
59. Z. Shen, M. Qu, J. Shi, F. E. Oropeza, V. A. de la Peña O'Shea, G. Gorni, C. M. Tian, J. P. Hofmann, J. Cheng, J. Li and K. H. L. Zhang, *J. Energy. Chem.*, 2022, **65**, 637-645.
60. C. Feng, Q. Q. Gao, G. Y. Xiong, Y. F. Chen, Y. Pan, Z. Y. Fei, Y. P. Li, Y. K. Lu, C. G. Liu and Y. Q. Liu, *Appl. Catal. B*, 2022, **304**, 121005.
61. M. L. Weber, G. Lole, A. Kormanyos, A. Schwiers, L. Heymann, F. D. Speck, T. Meyer, R. Dittmann, S. Cherevko, C. Jooss, C. Baeumer and F. Gunkel, *J. Am. Chem. Soc.*, 2022, **144**, 17966-17979.
62. Y. D. Ren, J. Oyama, T. Uchiyama, Y. Orikasa, T. Watanabe, K. Yamamoto, T. Takami, Y. Nishiki, S. Mitsushima and Y. Uchimoto, *Acs Appl. Energ. Mater.*, 2022, **5**, 4108-4116.
63. A. Ikeda, Y. H. Matsuda, K. Sato, Y. Ishii, H. Sawabe, D. Nakamura, S. Takeyama and J. Nasu, *Nat. Commun.*, 2023, **14**, 1744.

64. B. Zhu, Q.-W. Li, Y.-C. Li, Y.-Q. Xia, J.-L. Liu, A. M. Zhou and X.-M. Zhang, *Chem. Eng. J.*, 2023, **469**, 143897.
65. D. Li, H. Wang, K. Li, B. Zhu, K. Jiang, D. Backes, L. S. I. Veiga, J. Shi, P. Roy, M. Xiao, A. Chen, Q. Jia, T. L. Lee, S. S. Dhesi, D. O. Scanlon, J. L. MacManus-Driscoll, P. A. van Aken, K. H. L. Zhang and W. Li, *Nat. Commun.*, 2023, **14**, 3638.
66. X. H. Zheng, B. Li, L. J. Shen, Y. N. Cao, Y. Y. Zhan, S. T. Zheng, S. P. Wang and L. L. Jiang, *Appl. Catal. B*, 2023, **329**, 122526.
67. Y. Zhang, W. M. Postiglione, R. Xie, C. Zhang, H. Zhou, V. Chaturvedi, K. Heltemes, H. Zhou, T. Feng, C. Leighton and X. Wang, *Nat. Commun.*, 2023, **14**, 2626.
68. M. Y. Wang, K. C. Chukwu, B. A. Muhich, W. S. Samarakoon, Z. Z. He, M. Lucero, C. W. Chang, A. L. Chang, D. Q. Yang, S. Kaur, A. T. N'Diaye, G. E. Sterbinsky, Y. G. Du, L. Fei, L. Arnadóttir and Z. X. Feng, *Electrochim. Acta*, 2023, **466**, 143034.
69. Z. Shi, F. Dong, Z. C. Tang and X. Y. Dong, *Chem. Eng. J.*, 2023, **473**, 145476.
70. F. Hadji, M. Omari and M. Mebarki, *Ceram. Int.*, 2023, **49**, 25405-25413.
71. H. Zhou, W. Zhao, Z. M. Lu, S. C. He, B. Yin, Y. F. Zheng, L. Ge and H. Chen, *Electrochim. Acta*, 2023, **462**, 142757.
72. W. Z. Zhang, F. K. Li, W. Zhang, Y. Wang, S. Liu, X. P. Mo and K. X. Li, *Sep. Purif. Technol.*, 2023, **317**, 123775.
73. J. Ran, L. Wang, M. Si, X. Liang and D. Gao, *Small*, 2023, **19**, e2206367.
74. T. D. Brown, A. Zhang, F. U. Nitta, E. D. Grant, J. L. Chong, J. Zhu, S. Radhakrishnan, M. Islam, E. J. Fuller, A. A. Talin, P. J. Shamberger, E. Pop, R. S. Williams and S. Kumar, *Nature*, 2024, **633**, 804-810.
75. K. Moorthi, B. Sivakumar, B. Chokkiah, H. Valdes and S. Mohan, *ACS Appl. Nano Mater.*, 2024, **7**, 18511-18522.
76. T. Miruszewski, R. Strandbakke, K. Dzierzgowski, I. Szpunar, A. Mielewczyk-Gryn, S. Wachowski and M. Gazda, *J. Mater. Chem. A*, 2024, **12**, 13488-13497.

77. K. S. Woo, A. Zhang, A. Arabelo, T. D. Brown, M. Park, A. A. Talin, E. J. Fuller, R. S. Bisht, X. Qian, R. Arroyave, S. Ramanathan, L. Thomas, R. S. Williams and S. Kumar, *Nat. Commun.*, 2024, **15**, 4656.
78. A. Abouserie, D. Rohrens, D. Formenti, X. C. Wu, L. Patterer, F. Ott, G. Dalfollo, J. M. Schneider, R. Palkovits and U. Simon, *J. Phys. Chem. C*, 2024, **128**, 3281-3294.
79. F. Bai, J. Schulwitz, T. Priamushko, U. Hagemann, A. Kostka, M. Heidelmann, S. Cherevko, M. Muhler and T. Li, *J. Catal.*, 2024, **438**, 115697.
80. H. P. Chen, H. A. Xie, C. Yang, J. S. Pang, N. Q. Zhao, C. N. He and E. Z. Liu, *Electrochim. Acta*, 2024, **491**, 144339.
81. S. Biswas, N. Naushad, K. S and V. B. Kamble, *ACS Mater. Au*, 2024, **4**, 308-323.
82. M. Kim, J. Cho, K. Tae Park, C. Houn Rhee, H. Woong Park and J. Chul Jung, *J. Ind. Eng. Chem.*, 2024, **139**, 250-257.
83. H. Yu, N. Liedienov, I. Zatonvsky, D. Butenko, I. Fesych, W. Xu, C. Song, Q. Li, B. Liu, A. Pashchenko and G. Levchenko, *ACS Appl. Mater. Interfaces*, 2024, **16**, 3605-3620.
84. S. Afzal, A. Mehmood, L. Jin, K. Pan, M. Ahmad, M. Javid, M. Ikram, M. Zhang and L. Liu, *Sep. Purif. Technol.*, 2025, **354**, 128823.
85. M. Lu, C. Xu, Y. Zhan and J. Y. Lee, *Chem. Asian. J.*, 2016, **11**, 1210-1217.
86. K. Liu, J. Li, Q. F. Wang, X. P. Wang, D. Qian, J. B. Jiang, J. H. Li and Z. H. Chen, *J. Alloy Compd*, 2017, **725**, 260-269.
87. S. X. Zhuang, Z. H. Wang, J. Y. He, D. L. Jia, Q. B. Wang, M. Lu and F. Y. Tu, *Sustain. Mater. Technol.*, 2021, **29**, e00282.
88. A. K. Vats, A. Kumar, P. Rajput and A. Kumar, *J. Mater. Sci.: Mater. Electron.*, 2022, **33**, 2590-2606.
89. T. R. Mignoli, T. L. R. Hower, R. M. B. Alves and M. Schmal, *Appl. Catal. A*, 2022, **635**, 118553.
90. M. N. Lu, H. Li, S. J. M. Li, F. C. Yang, Y. Cao and W. F. Qiu, *Sustain. Energy Fuels*, 2022, **6**, 3453-3464.

91. J. Ahmed, T. Ahamad, N. Alhokbany, M. A. Majeed Khan, P. Arunachalam, M. S. Amer, R. M. Alotaibi and S. M. Alshehri, *J. Ind. Eng. Chem.*, 2023, **121**, 100-106.
92. A. K. Rana and A. A. Hussain, *J. Mater. Sci.*, 2024, **59**, 17128-17144.
